# Supplementary material for: Estimating prevalence trends in adult gonorrhoea and syphilis in low- and middle-income countries with the Spectrum-STI model: results for Zimbabwe and Morocco from 1995 to 2016
Source: PubMed Central journal article supplement — Sex Transm Infect. 2017 Mar 21;93(8):599–606. doi: 10.1136/sextrans-2016-052953 (PMC5739862; doi:10.1136/sextrans-2016-052953), 2017-03-21
Supplement: sextrans-2016-052953supp002.pdf [file sextrans-2016-052953supp002.pdf]

**Supplementary File 2. Prevalence data, adjustments for diagnostic test performance, missing high-risk populations and urban-to-rural prevalence ratios, and data point weights used in the Spectrum-STI prevalence and trend estimation for adult women (15-49 years)**

- (a) Zimbabwe syphilis
- (b) Morocco syphilis
- (c) Zimbabwe gonorrhoea
- (d) Morocco gonorrhoea.

(a) Zimbabwe syphilis

| Year | Population                 | N, tested | TPHA + | TPHA% | RPR + | RPR%  | TPHA+ RPR+ | TPHA+ RPR+ % | Diagnostic test, data point used | Test-adjusted | High-risk adjusted | Weight |
|------|----------------------------|-----------|--------|-------|-------|-------|------------|--------------|----------------------------------|---------------|--------------------|--------|
| 2000 | ANC sentinel, 19 sites [1] | 5,163     | 261    | 5.1%  |       |       |            |              | TPHA                             | 4.0%          | 4.4%               | 35%    |
| 2001 | ANC sentinel, 19 sites [2] | 6,790     |        |       |       |       | 47         | 0.69         | RPR+TPHA                         | 0.55%         | 0.61%              | 35%    |
| 2002 | ANC sentinel, 19 sites [3] | 6,942     |        |       |       |       | 124        | 1.79%        | RPR+TPHA                         | 1.79%         | 1.96%              | 35%    |
| 2004 | ANC sentinel, 19 sites [4] | 6,775     |        |       |       |       | 114        | 1.68%        | RPR+TPHA                         | 1.01%         | 1.11%              | 35%    |
| 2006 | ANC sentinel, 19 sites [5] | 7,363     |        |       |       |       | 68         | 0.92%        | RPR+TPHA                         | 0.55%         | 0.61%              | 35%    |
| 2009 | ANC sentinel, 19 sites [6] | 7,310     |        |       |       |       | 59         | 0.81%        | RPR+TPHA                         | 0.48%         | 0.53%              | 35%    |
| 2012 | ANC sentinel, 54 sites [7] | 18,455    |        |       |       |       | 328        | 1.78%        | RPR+TPHA                         | 1.1%          | 1.2%               | 100%   |
| 2008 | ANC routine screening      | 33,047    | 1,125  | 3.4%  |       |       |            |              | Rapid test                       | 2.4%          | 2.6%               | 13%    |
| 2010 |                            | 222,418   | 9,592  | 4.3%  |       |       |            |              | Rapid test                       | 3.0%          | 3.3%               | 56%    |
| 2010 |                            | 119,929   |        |       |       | 2,240 | 1.9%       |              | RPR                              | 1.1%          | 1.2%               | 66%    |
| 2011 |                            | 316,463   | 5,276  | 1.7%  |       |       |            |              | Rapid test                       | 1.2%          | 1.3%               | 82%    |
| 2012 |                            | 414,784   | 7,676  | 1.9%  |       |       |            |              | Rapid test                       | 1.3%          | 1.4%               | 96%    |
| 2013 |                            | 383,993   | 8,647  |       |       |       |            |              | RPR                              | 1.4%          | 1.5%               | 93%    |
| 2014 |                            | 392,093   | 8,406  |       |       |       |            |              | RPR                              | 1.3%          | 1.4%               | 91%    |

| Year | Population         | N, tested | TPHA + | TPHA% | RPR + | RPR%  | TPHA+ RPR+ | TPHA+ RPR+ % | Diagnostic test, data point used | Test-adjusted | High-risk adjusted | Weight |
|------|--------------------|-----------|--------|-------|-------|-------|------------|--------------|----------------------------------|---------------|--------------------|--------|
| 2015 |                    | 428,933   |        |       | 8,146 | 1.9%  |            |              | Rapid test                       | 1.3%          | 1.5%               | 99%    |
| 2001 | Non-ANC adults [8] | F 904     |        |       | 20    | 2.21% |            |              | RPR and TPHA                     | 2.21%         | 2.4%               | 10%    |
|      |                    | M 692     |        |       | 8     | 1.16% |            |              | RPR and TPHA                     | 1.16%         | 1.3%               |        |

(b) Morocco syphilis

| Year      | Population & sites                          | N      | TPH A+ | TPHA %       | RPR + | RPR%         | TPHA+ RPR+ | TPHA+ RPR+ % | Diagnostic test, data point used | Test-adjusted | High-risk adjusted | Weight |
|-----------|---------------------------------------------|--------|--------|--------------|-------|--------------|------------|--------------|----------------------------------|---------------|--------------------|--------|
| 1996      | ANC sentinel, 9 sites                       | 2459   |        |              | 175   | <b>7.1%</b>  |            |              | RPR                              | 4.3%          | 4.7%               | 30%    |
| 1999      | ANC, Rabat/ & Salé [9]                      | 323    |        |              |       |              | 5          | <b>1.55%</b> | RPR+TPHA                         | 1.55%         | 1.70%              | 6.7%   |
| 1999      | FP, Rabat & Salé [9]                        | 518    |        |              |       |              | 18         | <b>3.50%</b> | RPR+TPHA                         | 3.50%         | 3.80%              | 6.7%   |
| 1999      | ANC sentinel, 9 sites*                      | 10,135 | 113    | <b>1.11%</b> | 154   | 1.52%        |            |              | TPHA*                            | 0.89%         | 0.98%              | 30%    |
| 2001      | ANC sentinel, 9 sites                       | 3,154  |        |              | 63    | <b>2.00%</b> |            |              | RPR                              | 1.20%         | 1.32%              | 30%    |
| 2002      | ANC sentinel, 19 sites                      | 16,666 |        |              | 225   | <b>1.35%</b> |            |              | RPR                              | 0.81%         | 0.89%              | 63%    |
| 2004      | ANC sentinel, 23 sites                      | 18,302 |        |              | 187   | <b>1.02%</b> |            |              | RPR                              | 0.61%         | 0.67%              | 77%    |
| 2005      | ANC sentinel, 25 sites*                     | 17,711 | 129    | <b>0.73%</b> | 148   | 1.00%        |            |              | TPHA*                            | 0.58%         | 0.64%              | 83%    |
| 2007      | ANC sentinel, 27 sites*                     | 16,422 | 179    | <b>1.09%</b> | 161   | 1.13%        |            |              | TPHA*                            | 0.87%         | 0.96%              | 90%    |
| 2009      | ANC sentinel, >30 sites*                    | 15,290 | 166    | <b>1.09%</b> | 135   | 1.01%        |            |              | TPHA*                            | 0.87%         | 0.96%              | 100%   |
| 2010      | ANC sentinel, 6 high-HIV sites              | 3,147  | 35     | <b>1.11%</b> | 26    | 1.11%        |            |              | TPHA*                            | 0.89%         | 0.98%              | 20%    |
| 2011-2012 | ANC; Agadir, Fes, Rabat, Salé & Temara [10] | 252    |        |              | 4     | <b>1.59%</b> |            |              | RPR                              | 0.95%         | 1.05%              | 17%    |
| 2011-2012 | FP, Agadir, Fes, Rabat, Salé & Temara [10]  | 537    |        |              | 13    | <b>2.42%</b> |            |              | RPR                              | 1.45%         | 1.60%              | 17%    |

| Year | Population & sites     | N     | TPH A+ | TPHA %       | RPR + | RPR%  | TPHA+ RPR+ | TPHA+ RPR+ % | Diagnostic test, data point used | Test-adjusted | High-risk adjusted | Weight |
|------|------------------------|-------|--------|--------------|-------|-------|------------|--------------|----------------------------------|---------------|--------------------|--------|
| 2012 | ANC sentinel, 18 sites | 7,981 | 78     | <b>0.98%</b> | 53    | 0.44% |            |              | TPHA*                            | 0.78%         | 0.86%              | 60%    |

## (c) Zimbabwe gonorrhoea

| Year      | Country & weight | Location                              | Population                                          | Geography | N   | Specimen | Diagnostic | Observed prevalence | Test-adjusted | Urban-rural adjusted | High-risk adjusted |
|-----------|------------------|---------------------------------------|-----------------------------------------------------|-----------|-----|----------|------------|---------------------|---------------|----------------------|--------------------|
| 1999      | Zimbabwe, 100%   | Greater Harare [11, 12]               | PHC attendees for ANC, FP or child preventive cares | Urban     | 212 | Genital  | PCR        | 2.4%                | 2.2%          | 2.1%                 | 2.3%               |
| 2000      | Zimbabwe, 100%   | Masvingo Province [12, 13]            | Women students, three days school                   | Rural     | 245 | Urine    | PCR        | 2.9%                | 2.8%          | 2.9%                 | 3.2%               |
| 2000      | Zimbabwe, 100%   | Masvingo Province [12, 13]            | Adolescent girls recruited house to house           | Rural     | 269 | Urine    | PCR        | 1.9%                | 1.7%          | 1.8%                 | 2.0%               |
| 2000      | Zimbabwe, 100%   | Masvingo Province [12, 13]            | Male students, three days school                    | Rural     | 319 | Urine    | PCR        | 1.9%                | 2.2%          | 2.3%                 | 2.5%               |
| 2000      | Zimbabwe, 100%   | Masvingo Province [12, 13]            | Adolescent boys recruited house to house            | Rural     | 314 | Urine    | PCR        | 3.5%                | 4.2%          | 4.4%                 | 4.9%               |
| 2000      | Zimbabwe, 100%   | Greater Harare [11, 12]               | Pregnant women, sentinel sites                      | Urban     | 177 | Genital  | PCR        | 1.1%                | 0.89%         | 0.84%                | 0.93%              |
| 2001      | Zimbabwe, 100%   | 32 rural villages [8]                 | General population, women                           | Rural     | 715 | Genital  | PCR        | 1.4%                | 1.2%          | 1.2%                 | 1.4%               |
| 2001      | Zimbabwe, 100%   | 32 rural villages [8]                 | General population, men                             | Rural     | 564 | Urine    | PCR        | 0.89%               | 0.97%         | 1.0%                 | 1.1%               |
| 2000-2001 | Botswana, 10%    | Gaborone, 13 ANC clinics [12, 14, 15] | ANC                                                 | Urban     | 703 | Genital  | LCR        | 3.0%                | 2.9%          | 2.7%                 | 3.0%               |
| 2001-2002 | Botswana, 10%    | Three towns [16]                      | ANC                                                 | Urban     | 268 | Urine    | LCR        | 2.6%                | 2.5%          | 2.4%                 | 2.6%               |
| 2007-2008 | Botswana, 10%    | 7 districts [12]                      | ANC                                                 | National  | 337 | Urine    | PCR        | 3.3%                | 3.2%          | 3.2%                 | 3.6%               |

| Year      | Country & weight  | Location                                                   | Population              | Geography | N    | Specimen | Diagnostic           | Observed prevalence | Test-adjusted | Urban-rural adjusted | High-risk adjusted |
|-----------|-------------------|------------------------------------------------------------|-------------------------|-----------|------|----------|----------------------|---------------------|---------------|----------------------|--------------------|
| 1991-1992 | Mozambique, 10%   | Vilanculos [12, 17]                                        | ANC                     | Rural     | 201  | Genital  | Culture              | 7.0%                | 9.2%          | 9.7%                 | 10.6%              |
| 2000      | Mozambique, 10%   | Manhiça [12, 18]                                           | ANC                     | Rural     | 145  | Genital  | Culture & gram stain | 18.6%               | 23.6%         | 24.8%                | 27%                |
| 2004      | Mozambique, 10%   | Multi-center [19]                                          | ANC                     | National  | 835  | Urine    | PCR                  | 2.5%                | 2.4%          | 2.3%                 | 2.5%               |
| 2004      | Mozambique, 10%   | Two towns in Tete province [19]                            | ANC                     | Urban     | 835  | Urine    | PCR                  | 2.5%                | 2.4%          | 2.3%                 | 2.5%               |
| 2002      | South Africa, 10% | Kwamsane, rural KwaZulu Natal [20]                         | ANC                     | Rural     | 185  | Genital  | CUL                  | 8.1%                | 10.7%         | 11.2%                | 12.4%              |
| 2002      | South Africa, 10% | Vulindlela [21]                                            | ANC                     | Rural     | 221  | Genital  | PCR                  | 2.3%                | 2.1%          | 2.2%                 | 2.4%               |
| 2010-2011 | South Africa, 10% | Johannesburg [22]                                          | ANC                     | Urban     | 109  | Genital  | PCR                  | 0.92%               | 0.66%         | 0.63%                | 0.69%              |
| 2006-2007 | South Africa, 10% | Johannesburg [23]                                          | ANC                     | Urban     | 2499 | Genital  | PCR                  | 3.1%                | 3.0%          | 2.9%                 | 3.2%               |
| 2005-2008 | South Africa, 10% | Durban [23]                                                | ANC                     | Urban     | 2391 | Genital  | PCR                  | 3.1%                | 3.1%          | 2.9%                 | 3.2%               |
| 2007      | South Africa, 10% | Pretoria [23]                                              | ANC                     | Urban     | 200  | Genital  | PCR                  | 4.5%                | 4.5%          | 4.3%                 | 4.7%               |
| 2009      | South Africa, 10% | Durban [24]                                                | ANC                     | Urban     | 1459 | Genital  | PCR                  | 6.4%                | 6.5%          | 6.2%                 | 6.8%               |
| 2005-2008 | South Africa, 10% | KwaZulu Natal [23]                                         | ANC                     | Rural     | 1177 | Genital  | PCR                  | 7.0%                | 7.2%          | 7.5%                 | 8.3%               |
| 2011      | South Africa, 10% | Mopani District [25]                                       | ANC                     | Rural     | 604  | Genital  | PCR                  | 10.9%               | 11.4%         | 12.0%                | 13.2%              |
| 2002      | South Africa, 10% | Hlabisa [20, 26]                                           | ANC                     | Rural     | 449  | Genital  | PCR                  | 4.0%                | 4.0%          | 4.2%                 | 4.6%               |
| 2000      | South Africa, 10% | Khutsong (mining community adjacent to Carletonville) [27] | General population, men | Rural     | 606  | Urine    | PCR                  | 3.3%                | 4.0%          | 4.2%                 | 4.6%               |

| Year      | Country & weight  | Location                                                   | Population                | Geography | N    | Specimen | Diagnostic | Observed prevalence | Test-adjusted | Urban-rural adjusted | High-risk adjusted |
|-----------|-------------------|------------------------------------------------------------|---------------------------|-----------|------|----------|------------|---------------------|---------------|----------------------|--------------------|
| 2000      | South Africa, 10% | Khutsong (mining community adjacent to Carletonville) [27] | General population, women | Rural     | 893  | Urine    | PCR        | 8.6%                | 9.1%          | 9.6%                 | 10.5%              |
| 2006      | South Africa, 10% | Durban [28]                                                | ANC                       | Urban     | 702  | Urine    | SDA        | 0.85%               | 0.61%         | 0.57%                | 0.63%              |
| 2006      | South Africa, 10% | Hlabisa [28]                                               | ANC                       | Rural     | 346  | Urine    | SDA        | 1.2%                | 0.94%         | 1.0%                 | 1.1%               |
| 2002      | Zambia, 10%       | Lusaka [12, 29]                                            | ANC                       | Urban     | 642  | Genital  | Gram stain | 1.6%                | 0.75%         | 0.71%                | 0.78%              |
| 2006      | Zambia 10%        | Lusaka [28]                                                | ANC                       | Urban     | 319  | Urine    | SDA        | 0.63%               | 0.36%         | 0.34%                | 0.37%              |
| 2006-2007 | Zambia, 10%       | Mazabuka [23]                                              | ANC                       | Rural     | 1332 | Genital  | PCR        | 0.68%               | 0.40%         | 0.42%                | 0.47%              |

(d) Morocco gonorrhoea

| Year      | Country & weight | Location                      | Population                       | Geography | N   | Specimen | Diagnostic | Observed prevalence | Test-adjusted | Urban-rural adjusted | High-risk adjusted |
|-----------|------------------|-------------------------------|----------------------------------|-----------|-----|----------|------------|---------------------|---------------|----------------------|--------------------|
| 1999      | Morocco, 100%    | Rabat and Sale [9]            | ANC                              | Urban     | 323 | Urine    | PCR        | 0.62%               | 0.35%         | 0.33%                | <b>0.36%</b>       |
| 1999      | Morocco, 100%    | Rabat and Sale [9]            | Family Planning clinic attendees | Urban     | 518 | Urine    | PCR        | 0.97%               | 0.73%         | 0.69%                | <b>0.76%</b>       |
| 2011      | Morocco, 100%    | Rabat/ Salé/ Agadir /Fes [10] | ANC                              | Urban     | 252 | Genital  | PCR        | 0.79%               | 0.53          | 0.50%                | <b>0.55%</b>       |
| 2011      | Morocco, 100%    | Rabat/ Salé/ Agadir /Fes [10] | Family planning clinic attendees | Urban     | 537 | Genital  | PCR        | 0.37%               | 0.08          | 0.07%                | <b>0.08%</b>       |
| 1999-2000 | Egypt, 10%       | Greater Cairo [30]            | Family Planning clinic attendees | Urban     | 108 | Urine    | PCR        | 2.8%                | 2.7%          | 2.6%                 | <b>2.8%</b>        |
| 1999-2000 | Egypt, 10%       | Greater Cairo [30]            | ANC                              | Urban     | 604 | Urine    | PCR        | 2.0%                | 1.8%          | 1.7%                 | <b>1.9%</b>        |

Abbreviations: ANC = antenatal clinic attendants; FP = family planning clinic (female) clients; RPR = rapid plasma reagin; TPHA = *Treponema pallidum* haemagglutination assay; N = sample size tested; Test-adjusted = prevalence after adjusting for diagnostic test sensitivity & specificity; PHC = Primary Health Care; High-risk adjusted = prevalence after (+10%) adjustment for missing high-risk populations. Weight = statistical weight used in the Spectrum prevalence trend estimation; LCR = Ligase Chain Reaction (a type of Nucleic Amplification Assay); PCR: Polymerase Chain Reaction (a type of Nucleic Amplification Assay); SDA = Strand Displacement Assay.

Notes to Supplementary File 2 Table:

\* TPHA and RPR were measured in these ANC surveillance rounds, but the combined (TPHA+/RPHR+) prevalence was not recorded. The Spectrum-STI estimation used the TPHA prevalence from these ANC data, which was judged more relevant than the RPR-based prevalence because of higher sensitivity of TPHA.

Syphilis data points without a specific reference stated were provided by the Ministry of Health to the WHO, through the GARPR system, as described in Methods.

## References for Supplementary File 2:

1. Ministry of Health Zimbabwe, Health Information and Surveillance Unit, Department of Disease Prevention and Control. National survey of HIV and syphilis prevalence among women attending antenatal clinics in Zimbabwe, 2000. Harare2001.
2. Ministry of Health Zimbabwe, Health Information and Surveillance Unit, Department of Disease Prevention and Control. National survey of HIV and syphilis prevalence among women attending antenatal clinics in Zimbabwe, 2001. Harare2002.
3. Ministry of Health Zimbabwe, Health Information and Surveillance Unit, Department of Disease Prevention and Control, et al. National survey of HIV and syphilis prevalence among women attending antenatal clinics in Zimbabwe, 2002. Harare2002.
4. Ministry of Health Zimbabwe, Health Information and Surveillance Unit, Department of Disease Prevention and Control, et al. National survey of HIV and syphilis prevalence among women attending antenatal clinics in Zimbabwe, 2004. Harare2004.
5. Ministry of Health Zimbabwe, Health Information and Surveillance Unit, Department of Disease Prevention and Control, et al. National survey of HIV and syphilis prevalence among women attending antenatal clinics in Zimbabwe, 2006. Harare2007.
6. Ministry of Health and Child Welfare Zimbabwe, AIDS and TB programs. National survey of HIV and syphilis prevalence among women attending antenatal clinics in Zimbabwe, 2009. Harare2009.
7. Ministry of Health and Child Welfare Zimbabwe, AIDS and TB programs. National survey of HIV and syphilis prevalence among women attending antenatal clinics in Zimbabwe, 2012. Harare2012.
8. NIMH Collaborative HIV/STD Prevention Trial Group. Sexually transmitted disease and HIV prevalence and risk factors in concentrated and generalized HIV epidemic settings. *AIDS*. 2007;21 Suppl 2:S81-90.
9. Royaume du Maroc Programme National de lutte contre les IST/SIDA Direction de l'épidémiologie et des luttes contre les maladies du Ministère de la Santé. Etude de prévalence IST chez les femmes consultantes en SMI/PF à la Wilaya de Rabat, Rapport final. Rabat2001.
10. El Kettani A, Hañçali A, Bennani A, et al., editors. Prevalence of STIs in women seeking family planning and antenatal care in primary health care in Morocco. 17th IUSTI World Congress 2016; Marrakech.
11. Mbizvo EM, Msuya SE, Stray-Pedersen B, et al. Determinants of reproductive tract infections among asymptomatic women in Harare, Zimbabwe. *Cent Afr J Med*. 2001;47:57-64.
12. Chico RM, Mayaud P, Ariti C, et al. Prevalence of malaria and sexually transmitted and reproductive tract infections in pregnancy in sub-Saharan Africa: a systematic review. *JAMA*. 2012;307:2079-86.
13. Cowan FM, Langhaug LF, Mashungupa GP, et al. School based HIV prevention in Zimbabwe: feasibility and acceptability of evaluation trials using biological outcomes. *AIDS*. 2002;16:1673-8.
14. Romoren M, Rahman M. Syphilis screening in the antenatal care: a cross-sectional study from Botswana. *BMC Int Health Hum Rights*. 2006;6:8.
15. Romoren M, Sundby J, Velauthapillai M, et al. Chlamydia and gonorrhoea in pregnant Batswana women: time to discard the syndromic approach? *BMC Infect Dis*. 2007;7:27.
16. Paz-Bailey G, Rahman M, Chen C, et al. Changes in the etiology of sexually transmitted diseases in Botswana between 1993 and 2002: implications for the clinical management of genital ulcer disease. *Clin Infect Dis*. 2005;41:1304-12.
17. Vuylsteke B, Bastos R, Barreto J, et al. High prevalence of sexually transmitted diseases in a rural area in Mozambique. *Genitourin Med*. 1993;69:427-30.
18. Menendez C, Castellsague X, Renom M, et al. Prevalence and risk factors of sexually transmitted infections and cervical neoplasia in women from a rural area of southern Mozambique. *Infect Dis Obstet Gynecol*. 2010;2010.

19. Lujan J, de Onate WA, Delva W, et al. Prevalence of sexually transmitted infections in women attending antenatal care in Tete province, Mozambique. *S Afr Med J*. 2008;98:49-51.
20. Sturm PD, Connolly C, Khan N, et al. Vaginal tampons as specimen collection device for the molecular diagnosis of non-ulcerative sexually transmitted infections in antenatal clinic attendees. *Int J STD AIDS*. 2004;15:94-8.
21. Frohlich JA, Abdool Karim Q, Mashego MM, et al. Opportunities for treating sexually transmitted infections and reducing HIV risk in rural South Africa. *J Adv Nurs*. 2007;60:377-83.
22. Jespers V, Crucitti T, Menten J, et al. Prevalence and correlates of bacterial vaginosis in different sub-populations of women in sub-Saharan Africa: a cross-sectional study. *PLoS One*. 2014;9:e109670.
23. McCormack S, Ramjee G, Kamali A, et al. PRO2000 vaginal gel for prevention of HIV-1 infection (Microbicides Development Programme 301): a phase 3, randomised, double-blind, parallel-group trial. *Lancet*. 2010;376:1329-37.
24. Moodley D, Moodley P, Sebitloane M, et al. High prevalence and incidence of asymptomatic sexually transmitted infections during pregnancy and postdelivery in KwaZulu Natal, South Africa. *Sex Transm Dis*. 2015;42:43-7.
25. Peters RP, Dubbink JH, van der Eem L, et al. Cross-sectional study of genital, rectal, and pharyngeal Chlamydia and gonorrhoea in women in rural South Africa. *Sex Transm Dis*. 2014;41:564-9.
26. Johnson LF, Coetzee DJ, Dorrington RE. Sentinel surveillance of sexually transmitted infections in South Africa: a review. *Sex Transm Infect*. 2005;81:287-93.
27. Williams BG, Taljaard D, Campbell CM, et al. Changing patterns of knowledge, reported behaviour and sexually transmitted infections in a South African gold mining community. *AIDS*. 2003;17:2099-107.
28. Guffey MB, Richardson B, Husnik M, et al. HPTN 035 phase II/Ib randomised safety and effectiveness study of the vaginal microbicides BufferGel and 0.5% PRO 2000 for the prevention of sexually transmitted infections in women. *Sex Transm Infect*. 2014;90:363-9.
29. Aboud S, Msamanga G, Read JS, et al. Genital tract infections among HIV-infected pregnant women in Malawi, Tanzania and Zambia. *Int J STD AIDS*. 2008;19:824-32.
30. El-Sayed, Abdallah M, Abdel Mobdy A, et al. Evaluation of Selected Reproductive Health Infections in Various Egyptian Population Groups in Greater Cairo. Cairo, Egypt: MOHP, IMPACT/FHI/USAID2002.
