# Supplementary material for: Estimating prevalence trends in adult gonorrhoea and syphilis in low- and middle-income countries with the Spectrum-STI model: results for Zimbabwe and Morocco from 1995 to 2016
Source: PubMed Central journal article supplement — Sex Transm Infect. 2017 Mar 21;93(8):599–606. doi: 10.1136/sextrans-2016-052953 (PMC5739862; doi:10.1136/sextrans-2016-052953), 2017-03-21
Supplement: sextrans-2016-052953supp003.pdf [file sextrans-2016-052953supp003.pdf]

**Supplementary file 3. Sensitivities and specificities assumed for diagnostic tests of gonorrhoea, used to adjust observed gonorrhoea prevalences before time trend estimation**

| Specimen      | Sex | Test                               | Sensitivity %       | Specificity %       | Comment                                                                                                                    |
|---------------|-----|------------------------------------|---------------------|---------------------|----------------------------------------------------------------------------------------------------------------------------|
| Genital fluid | F   | PCR or LCR                         | 93.3 <sup>1 2</sup> | 99.7 <sup>1 2</sup> | We pooled specificities for genital/cervical fluid with those of urine, as specificities were not statistically different. |
| Genital fluid | F   | Culture                            | 75.7 <sup>2</sup>   | 100 <sup>1 2</sup>  |                                                                                                                            |
| Urine         | F   | PCR or LCR                         | 91.6 <sup>1 2</sup> | 99.7 <sup>1 2</sup> | We pooled specificities for genital/cervical fluid with those of urine, as specificities were not statistically different. |
| Urine         | F   | SDA                                | 91.6 <sup>1 2</sup> | 99.7 <sup>1 2</sup> | We pooled specificities for genital/cervical fluid with those of urine, as specificities were not statistically different. |
| Genital fluid | F   | Gram stain, or culture/ gram stain | 75.7 <sup>2 3</sup> | 98.8 <sup>3</sup>   |                                                                                                                            |
| Urine         | M   | PCR or LCR                         | 80.9 <sup>2</sup>   | 99.9 <sup>2</sup>   |                                                                                                                            |

Abbreviations: EIA = enzyme immuno-assay; LCR = ligase chain reaction (a type of nucleic amplification assay); PCR = polymerase chain reaction (a type of nucleic amplification assay); SDA = strand displacement assay.

### References for Supplementary File 3:

1. Cook RL, Hutchison SL, Ostergaard L, et al. Systematic review: noninvasive testing for Chlamydia trachomatis and Neisseria gonorrhoeae. *Ann Intern Med* 2005;142(11):914-25.
2. Newman L, Rowley J, VanderHoorn S, et al. Global estimates of the prevalence and incidence of four curable sexually transmitted infections in 2012. *PLoS One* 2015;10(12):e0143304.
3. Chico RM, Mayaud P, Ariti C, et al. Prevalence of malaria and sexually transmitted and reproductive tract infections in pregnancy in sub-Saharan Africa: a systematic review. *JAMA* 2012;307(19):2079-86.
